# Supplementary material for: Poly(vinylidene fluoride)/poly(acrylonitrile) – based superior hydrophobic piezoelectric solid derived by aligned carbon nanotubes in electrospinning: fabrication, phase conversion and surface energy
Source: Royal Society of Chemistry journal article supplement (doi:10.1039/c5ra11584a), 2015-01-01
Supplement: c5ra11584a1.pdf [file c5ra11584a1.pdf]

## Supporting Information

### Poly (vinylidene fluoride) / Poly (acrylonitrile)–based Superior Hydrophobic Piezoelectric Solid Derived by Aligned Carbon Nanotube in Electrospinning: Fabrication, the Phase Conversion and Surface Energy

Salem M. Aqeel <sup>†‡</sup>, Zhe Wang <sup>\*‡§</sup>, Lisa Than <sup>§</sup>, Gollapudi Sreenivasulu <sup>||</sup> and Xiangqun Zeng <sup>\*‡</sup>

<sup>†</sup>Department of Chemistry, Faculty of Applied Science, Thamar University, P. O. Box 87246, Thamar, Yemen

<sup>‡</sup>Department of Chemistry, Oakland University, Rochester, Michigan 48309, United States

<sup>§</sup>Chemistry Department, Xavier University of Louisiana, New Orleans, Louisiana, 70125, United States

<sup>||</sup>Physics Department, Oakland University, Rochester, Michigan, 48309, United States

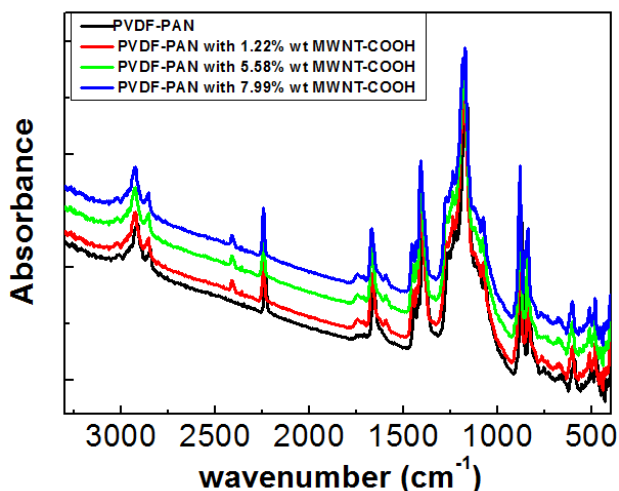

Fig S1: (A) FTIR spectra of PVDF–PAN and PVDF–PAN/MWNTs nanocomposites

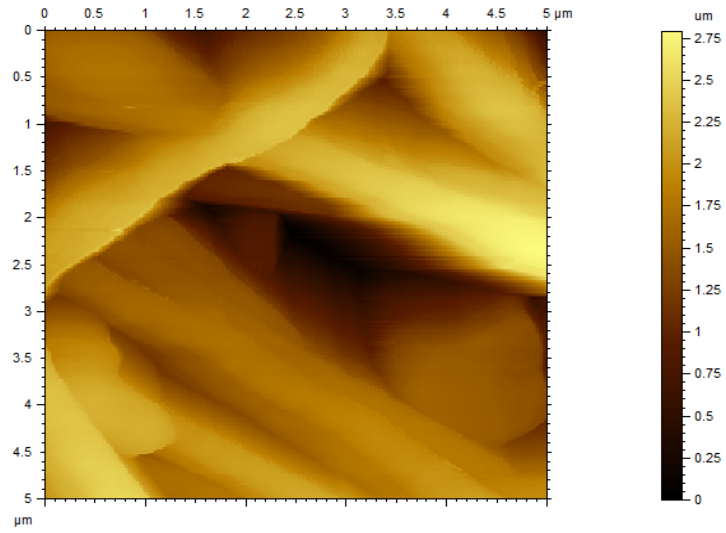

Fig. S2a : AFM images of surface topography for PVDF-PAN/MWNTs nanocomposites with 1.22 wt. % of MWNTs.

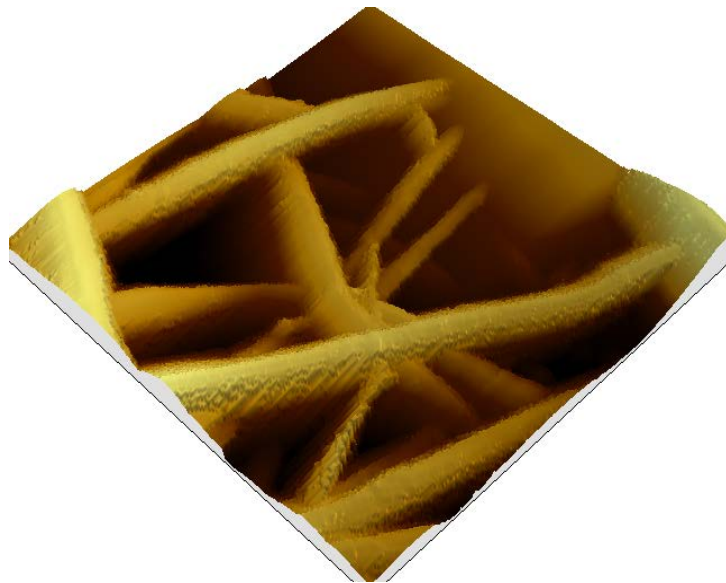

Fig. S2b : AFM images of three-dimensional surface for PVDF-PAN/MWNTs nanocomposites with 5.58 wt. % of MWNTs.

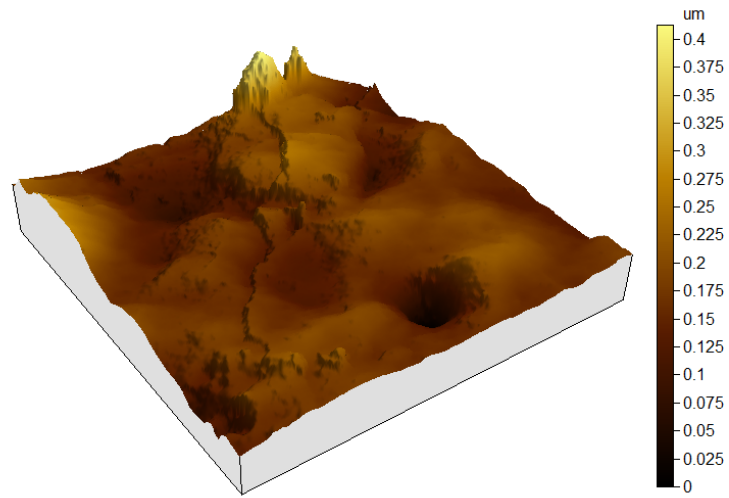

Fig. S2c : AFM images of three-dimensional surface for PVDF-PAN/MWNTs nanocomposites with 7.99 wt. % of MWNTs

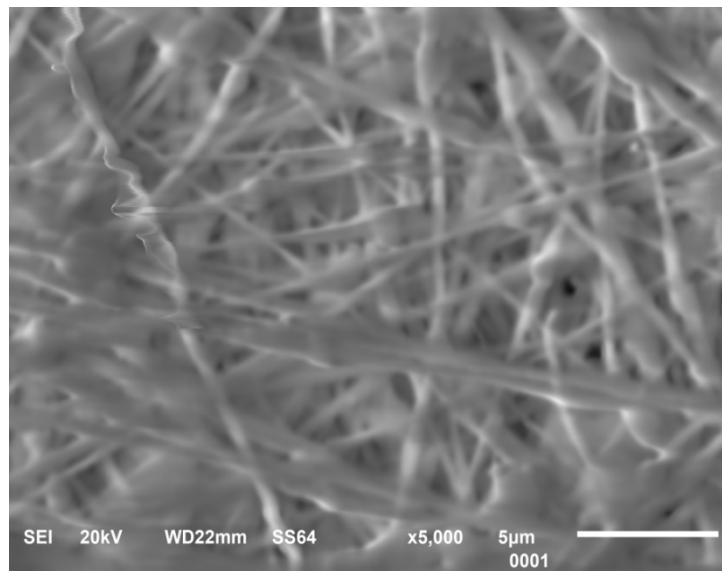

Fig. S3-a: SEM images of the PVDF-PAN-MWNT-COOH composite with 5.58 wt. % of MWNTs.

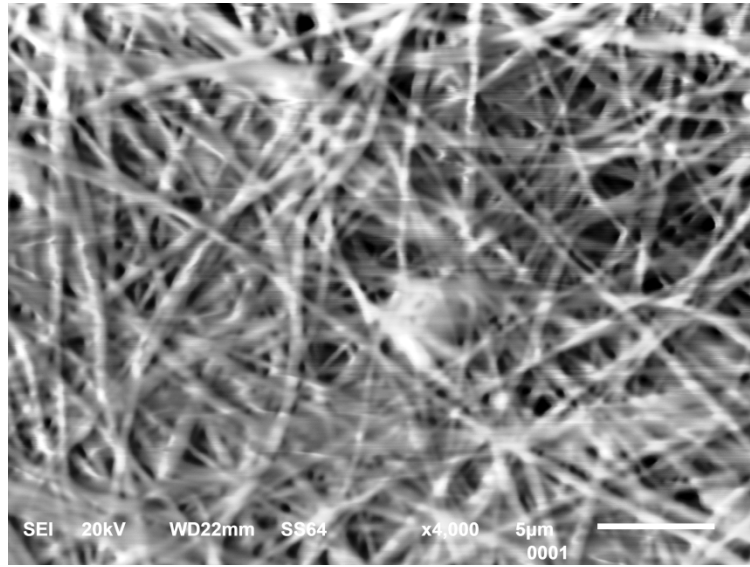

Fig. S3-b: SEM images of the PVDF-PAN-MWNT-COOH composite with 7.99 wt. % of MWNT.
